# Supplementary material for: Elucidating shape-mediated drug carrier mechanics of hematite nanomaterials for breast cancer therapeutics
Source: Royal Society of Chemistry journal article supplement (doi:10.1039/d4tb00052h), 2024-01-01
Supplement: d4tb00052h1.pdf [file d4tb00052h1.pdf]

## SUPPORTING INFORMATION

# Elucidating shape mediated drug carrier mechanics of Hematite Nanomaterials on Breast Cancer therapeutics

Kaviya Vijayalakshmi Babunagappan,<sup>a</sup> Thilak Raj<sup>a</sup>, Abirami Seetharaman,<sup>a</sup> Subastri Ariraman,<sup>a</sup> and Swathi Sudhakar,<sup>\*a</sup>

### 1.1 Analysis of the effect of Cis-EHNP and Cis-SHNP on MCF-7 Breast cancer cells for 48 h and 72 h

We analyzed the effect of Cis-EHNP and Cis-SHNP on MCF-7. MCF-7 cells were seeded with a density of 5000 cells/well and allowed to reach the confluent of 80 %. Then, the cells were treated with Cis-EHNP and Cis-SHNP at varying concentrations (0.1, 0.25, 0.5, 0.75, 1, and 1.25  $\mu\text{M}$ ). MTT assay was performed by washing the treated cells with 1X PBS, followed by adding 100  $\mu\text{L}$  of di-methyl thiazolyl diphenyl tetrazolium reagent (MTT) and analyzed after incubating for four h.

The cell viability of Cis-EHNP treated samples decreased from  $64 \pm 2 \%$ ,  $31 \pm 4 \%$ ,  $12 \pm 2.8 \%$ ,  $3 \pm 0.82 \%$ ,  $2 \pm 0.05 \%$ ,  $2 \pm 0.004 \%$ , with the increased concentration from 0.1  $\mu\text{M}$  to 1.25  $\mu\text{M}$  (Figure SI 1-A). Similarly, on treating the cells for 72h, a significant decrease in the cell viability compared to 48 h was observed till 0.25  $\mu\text{M}$ . Next, in the case of Cis-SHNP treated cells, the cell viability % declined from  $92 \pm 3 \%$ ,  $81 \pm 2 \%$ ,  $68 \pm 3.3 \%$ ,  $48 \pm 2.5 \%$ ,  $24 \pm 2 \%$  and  $16 \pm 1 \%$  at the varying concentrations. The cell viability further decreased with an increase in the incubation time to 72h. (Figure SI-1B)

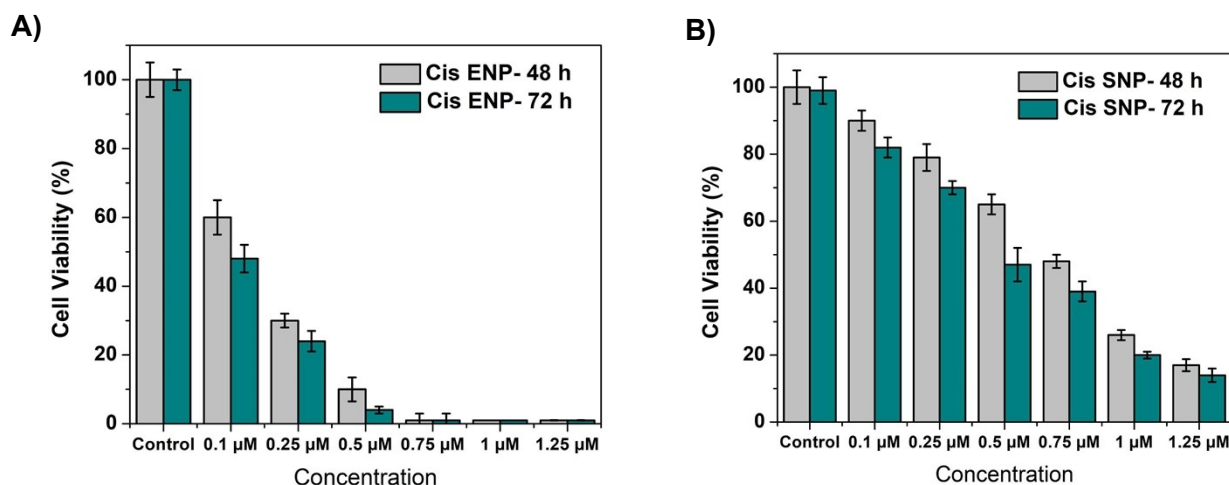

**Figure SI-1:** MTT assay shows the effect of (A) Cis-EHNP and (B) Cis-SHNP treated MCF-7 cells at the end of 48 h and 72 h.

### 1.2 Effect of EHNP and SHNP in MCF-7 Cancer cells

We also tested the effects of hematite nanoparticles alone (EHNP, SHNP) on MCF-7 cancer cells (Figure SI-2) with the same procedure mentioned in section 1.1. The cell viability percentage of control, EHNP, and SHNP-treated MCF-7 cells was observed to be  $100 \% \pm 4 \%$ ,  $99 \% \pm 3 \%$ , and  $99 \% \pm 3 \%$ , respectively. T-test analysis showed that there is no significant difference between control and EHNP, SHNP-treated MCF-7 cells.

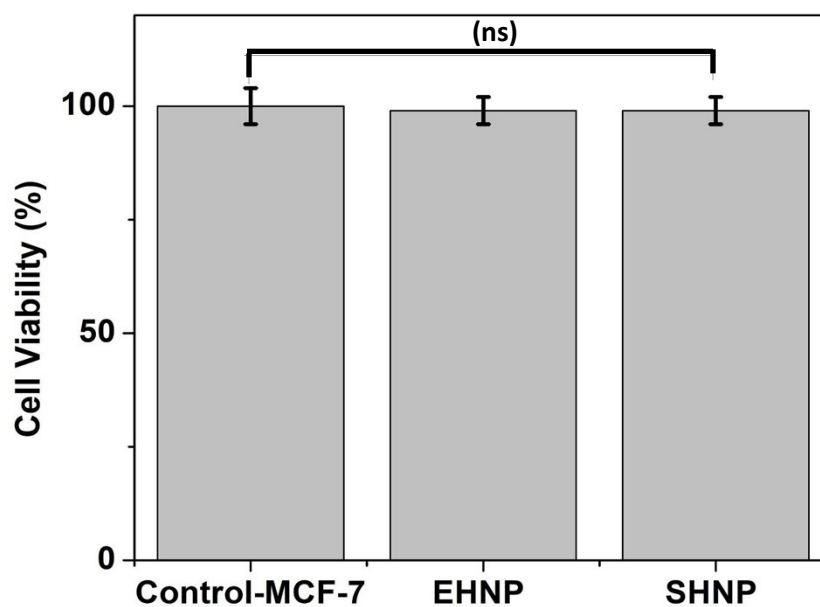

**Figure SI - 2:** The bar graph depicts the effect of EHNP and SHNP alone in MCF-7 breast cancer cells. Statistically analyzed using t-test  $p < 0.05$ , shows no significant difference between the control and SHNP, EHNP treated MCF-7 cells.

### 1.3 Size, zeta potential and SEM images of bare and cisplatin-loaded hematite nanoparticles

We performed the zeta potential analysis of cisplatin-loaded ellipsoidal and spherical hematite nanoparticles. The zeta potential values were observed to be  $2.6 \pm 0.87$  mV and  $-23.84 \pm 2.36$  mV for Cis-EHNP and Cis-SHNP, respectively. The Cis-loaded EHNP and SHNP showed more positive zeta potential compared to bare nanomaterials. This could be due to the positive charge of cisplatin, as reported previously.<sup>1,2</sup> Also, we characterized the cisplatin-loaded EHNP and SHNP using a scanning electron microscope (SEM) to visualize the morphology of drug-loaded nanoparticles and their sizes were measured using ImageJ software. (Table SI-1) SEM images show no morphological changes were observed for the Cis-EHNP and Cis-SHNP, indicating that the nanoparticles retain their morphological structure even after loading with cisplatin drug molecules.

**Table SI-1:** Size, zeta potential, and SEM images of EHNP, SHNP, Cis-EHNP, and Cis-SHNP.

| S.No | Nanocarrier | Size (nm)          | Zeta potential (mV) | Morphology                                                                            |
|------|-------------|--------------------|---------------------|---------------------------------------------------------------------------------------|
| 1.   | Bare EHNP   | $252 \pm 40$       | $-17.72 \pm 4.28$   | 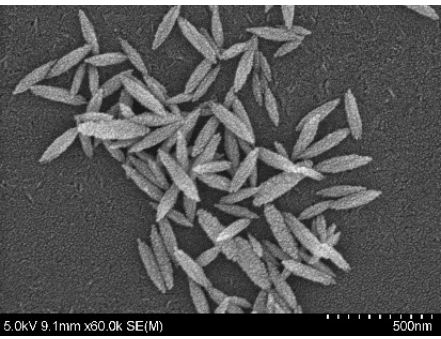  |
| 2.   | Bare SHNP   | $208 \pm 55$       | $-46.56 \pm 2.79$   | 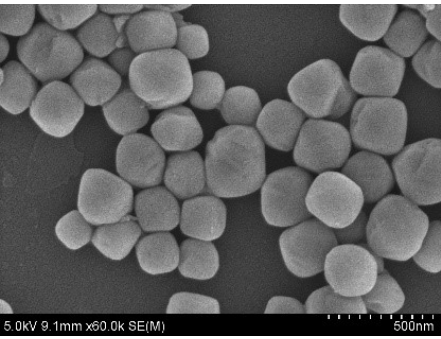 |
| 3.   | Cis-EHNP    | $254.16 \pm 29.42$ | $2.6 \pm 0.87$      | 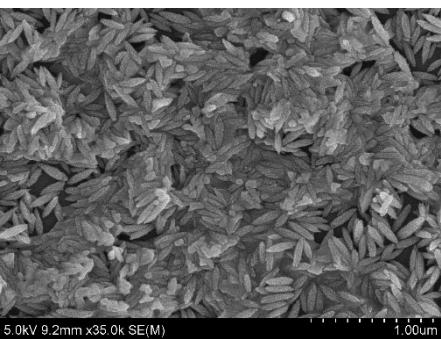 |

|    |          |                    |                    |                                                                                     |
|----|----------|--------------------|--------------------|-------------------------------------------------------------------------------------|
| 4. | Cis-SHNP | $244.69 \pm 42.79$ | $- 23.84 \pm 2.36$ | 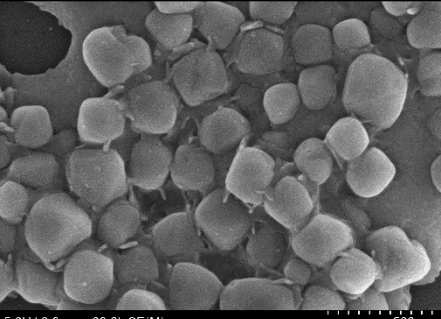 |
|----|----------|--------------------|--------------------|-------------------------------------------------------------------------------------|

#### 1.4 Cytotoxicity study of free cisplatin drug molecule on MCF-7 Breast cancer cells

We have also carried out the cytotoxicity for free cisplatin in the same concentration (0.001, 0.002, 0.005, 0.01, 0.02, 0.1, 0.25, 0.5, 0.75, 1, 1.5, 2, 5 and 10  $\mu\text{M}$ ) as loaded into EHNP and SHNP on MCF-7 cell lines. We found that free cisplatin showed no cytotoxicity for concentrations less than 100 nM. The  $\text{IC}_{50}$  value of 4  $\mu\text{M}$  was observed for free cisplatin, which was 20-fold higher than  $\text{IC}_{50}$  value of Cis-loaded EHNP and five-fold higher than Cis-loaded SHNP. The  $\text{IC}_{50}$  value of cisplatin alone observed in our studies is in agreement with previous studies.<sup>3</sup>

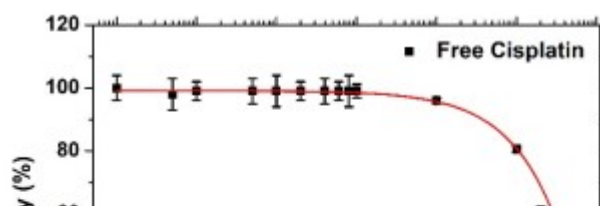

**Figure SI-3** The graph represents the results of the MTT assay analyzed the cytotoxic effects of free cisplatin drug molecule using MCF-7 breast cancer cell lines.

**References:**

- 1 J. Liu, T. Gong, C. Wang, Z. Zhong and Z. Zhang, *Int. J. Pharm.*, 2007, **340**, 153–162.
- 2 M. Ghaferi, S. Amari, B. V. Mohrir, A. Raza, H. E. Shahmabadi and S. E. Alavi, *Pharmaceuticals*, 2020, **13**, 44.
- 3 M. Poodat, A. Divsalar, B. Ghalandari and R. Khavarinezhad, *J. Iran. Chem. Soc.*, 2023, **20**, 739–750.
